# Supplementary material for: Expression of LGR5, FZD7, TROY, and MIST1 in Perioperatively Treated Gastric Carcinomas and Correlation with Therapy Response
Source: Hindawi journal article supplement (doi:10.1155/2019/8154926), 2019-11-19
Supplement: f1 [file 8154926.f1.pdf]

## Supplementary File S1

### Reverse transcriptase reaction and quantitative real-time PCR (qRT-PCR)

To validate the immunohistochemical stainings, at least four tissue sections not older than 5 years were selected for each marker, where distinct immunohistochemically positive and only weakly or intermediately stained areas were microdissected from 4 - 8 formalin-fixed and paraffin-embedded serial tissue sections. RNA was isolated using RNeasy FFPE Kit (QIAGEN GmbH, Hilden, Germany) and concentration measured using the NanoDrop 2000 device (Thermo Scientific, Darmstadt). For cDNA synthesis, up to 500 ng of total RNA were reverse transcribed with Maxima First Strand cDNA Synthesis Kit (Thermo Fisher Scientific, Schwerte, Germany). Quantitative PCR was carried out using QuantiTect SYBR Green PCR Kit (Qiagen, Hilden, Germany) on a Light Cycler 480 System (Roche, Mannheim, Germany). All assays were performed in duplicates, corrected for efficiency and normalized to succinate dehydrogenase (SDHA) as housekeeping gene by the LightCycler Analysis Software (version 1.5.0 SP3; Roche). The following primer sets were used: SDHA (5'-ATTTGGTGGACAGAGCCTCA-3' and 5'-CTGGTATCATATCGCAGAGACCT-3'); FZD7 (5'-AAGCGGTTTGGATGAAAAGA-3' and 5'-GATTCACATCGCCGTTATCA-3'); LGR5 (5'-AATTTGCGAAGCCTTCAATC-3' and 5'-GGGATTTCTGTTAACGCATTG-3'); TROY (5'-GGAGTGTGTGCCTTGTGGA-3' and 5'-GCGATCTTCACGAGGTTGA-3'); MIST1 (5'-CCAGCACTACCAGCAGCA-3' and 5'-AGGACTGGGCGCTAGGTG-3').

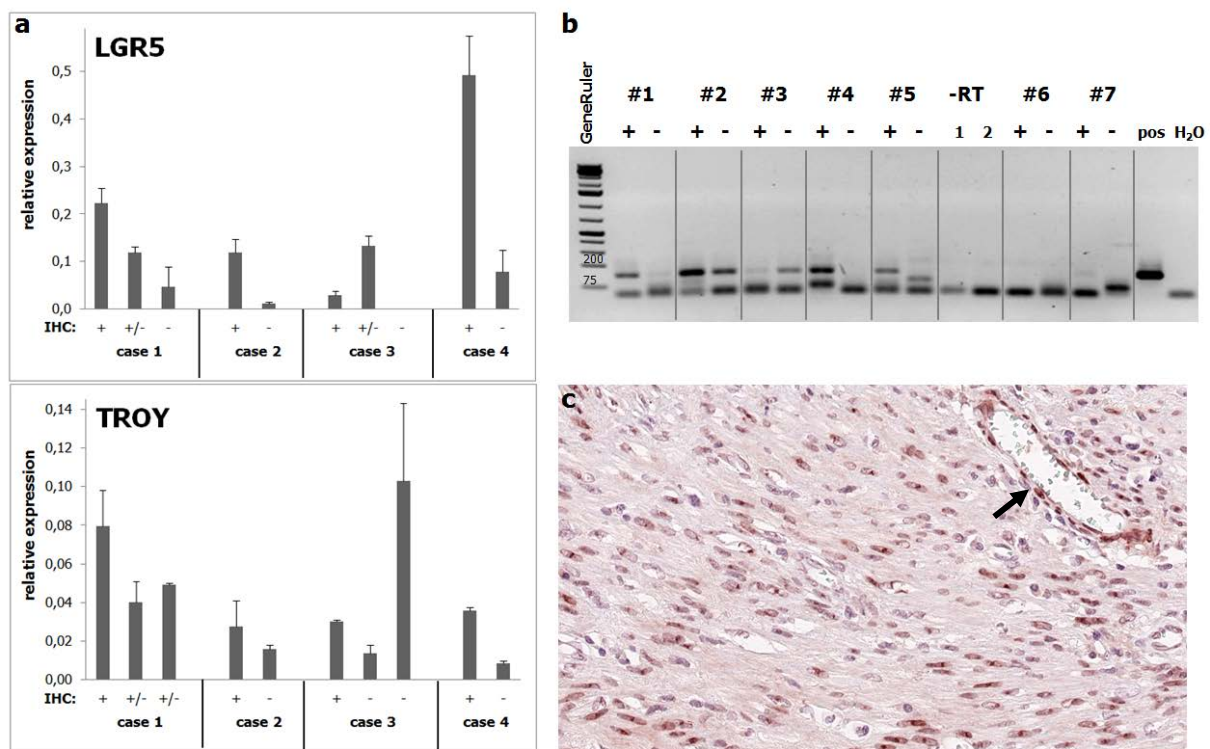

**Supplementary Figure S1: Validation of immunohistochemical staining (IHC) data for the stem cell markers LGR5, TROY and MIST1.**

A) From microdissected areas, relative expression of LGR5 and TROY was determined by qRT-PCR for four different cases. Values match perfectly to IHC classification with the exception of case3, where the weak cytoplasmic staining of LGR5 in muscle cells (area classified as +/-) results in the detection of large amounts of transcript. Nevertheless, in the dissected area from esophageal tissue (-), the LGR5 transcript is completely absent as expected (paired t-test of the relative expressions between positive and negative areas:  $p=0.117$ ). For TROY, the second negative area of case 3 shows unexpected high expression levels due to technical problems during preparation and a contamination by strong expressing stromal components (paired t-test of the relative expressions between positive and negative areas:  $p=0.833$ ).

B) Gel electrophoresis of qRT-PCR products for MIST1. From seven selected cases, enrichment of the specific product at 132 bp was detected for 5 cases in the IHC MIST1<sup>+</sup> region compared to the IHC MIST1<sup>-</sup> area. In case 6, no transcript was detected presumably due to low MIST1<sup>+</sup> cell numbers and low RNA quality. The positive control (reference cDNA, "pos") shows the specific product, whereas the negative controls (w/o reverse transcriptase "-RT" and water) only result in primer dimers.

C) Analysis of FZD7 was hampered by high expression in endothelial cells (arrow; anti-FZD7-antibody. Original magnification 400-fold).

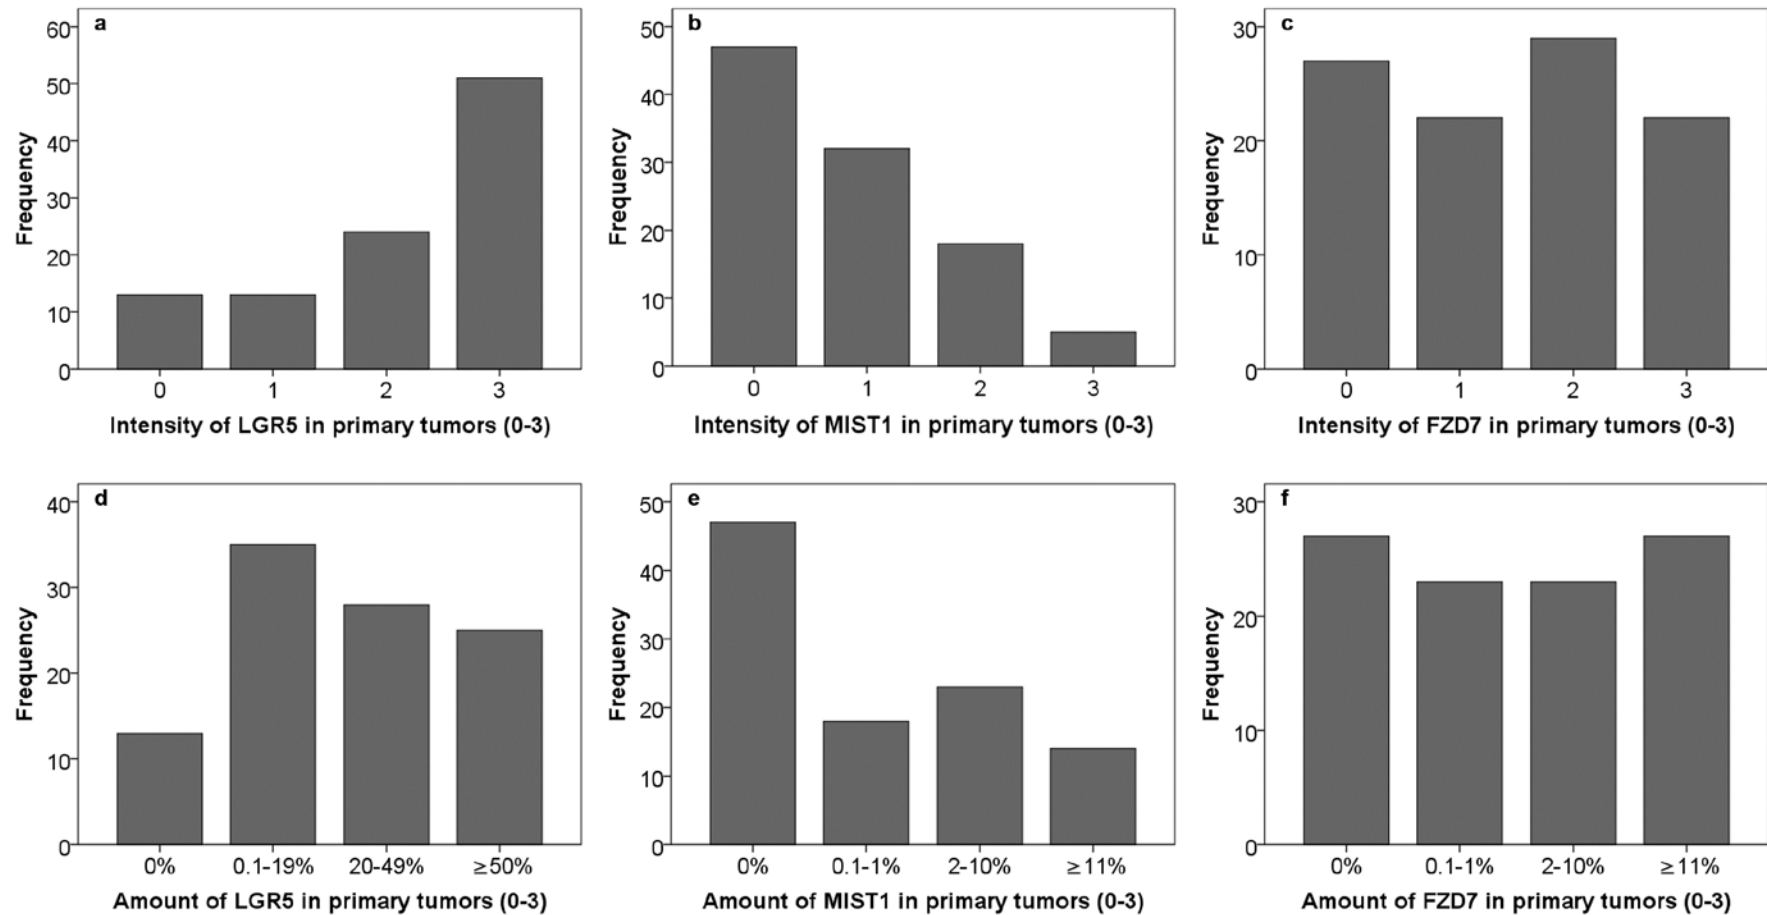

**Figure S2 Intensity groups (0-3) and amount groups (0-3) of positive tumor cells in primary tumor.**

The histograms show the distribution patterns of each putative stem cell marker in the tumor cells of the primary gastric carcinomas according to the intensity of immunostaining (category A) and the amount (percentage) of immunopositive cells (category B). LGR5 (a, d), MIST1 (b, e), FZD7 (c, f).

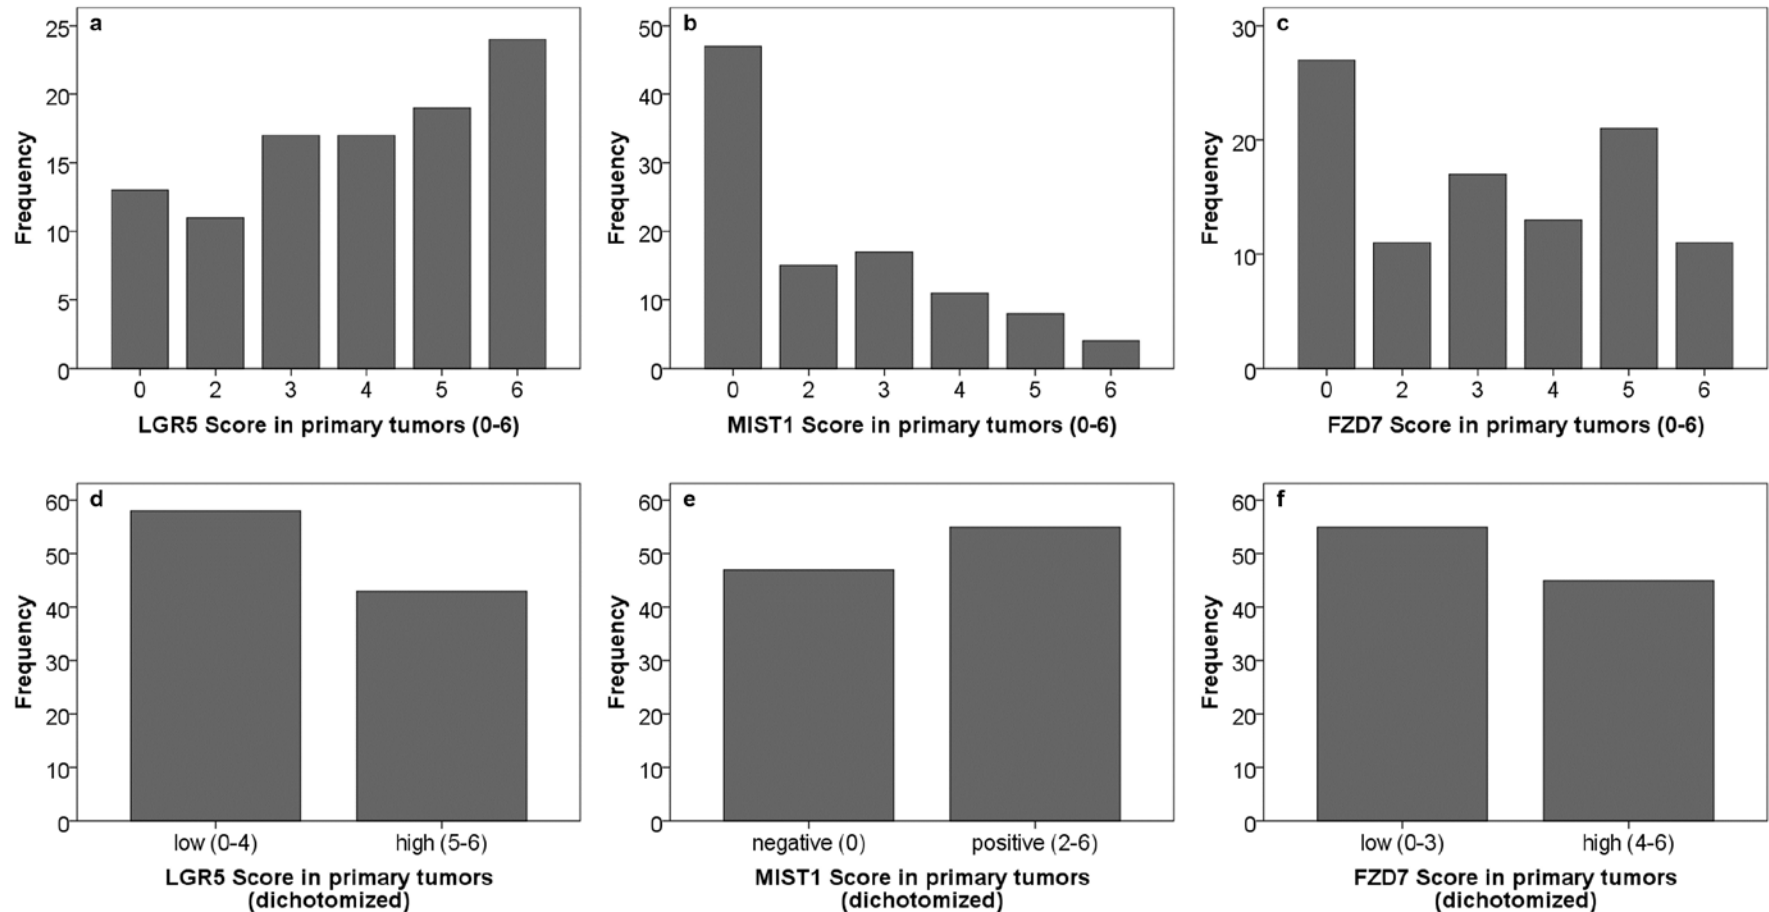

### Figure S3 Creation of immunoreactivity score in primary tumor

The addition of category A and B (see Figure S1) resulted in an immunoreactivity score ranging from 0 to 6 for each individual case and marker. Immunoreactivity score from 0 to 6 for LGR5 (a), MIST1 (b), FZD7 (c). Subsequently the immunoreactivity score was divided by the median for LGR5 (d), MIST1 (e), FZD7 (f).

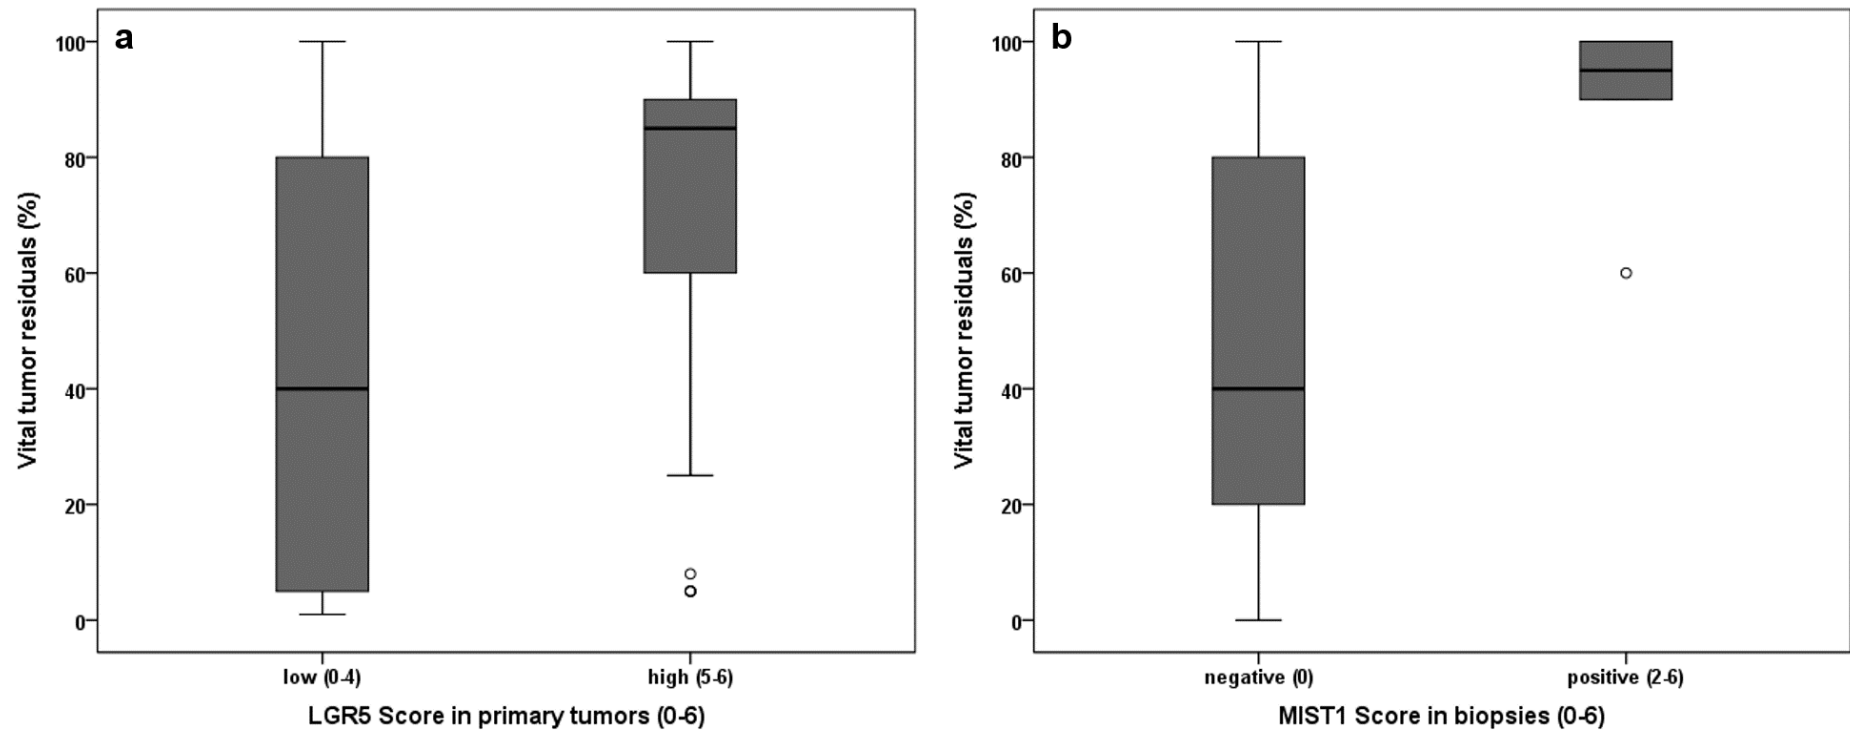

#### Figure S4 Therapy response

The LGR5 expression in primary tumors (dichotomized at the median immunoreactivity score into low and high) correlated significantly with the tumor regression assessed by the percentage of vital tumor cells in the primary tumor (a;  $p < 0.001$ ); MIST1 expression in biopsies (dichotomized at the median immunoreactivity score into low and high) correlated with tumor regression assessed by the percentage of tumor residuals (b;  $p = 0.048$ ).

**Table S5** Correlation of LGR5- and MIST1-expression in primary resected gastric cancer and pre-therapeutic biopsies, respectively, with tumor regression.

|                                |   |                  | Pre-therapeutic biopsy<br>LGR5 Score 0-6 |            | Primary resected tumor<br>MIST1 Score 0-6 |                | Primary resected tumor<br>FZD7 Score 0-6 |            | Pre-therapeutic biopsy<br>FZD7 Score 0-6 |                |
|--------------------------------|---|------------------|------------------------------------------|------------|-------------------------------------------|----------------|------------------------------------------|------------|------------------------------------------|----------------|
|                                | n | p <sup>(1)</sup> | low (0-4)                                | high (5-6) | negative (0)                              | positive (2-6) | low (0-3)                                | high (4-6) | negative (0)                             | positive (2-6) |
|                                |   |                  | n (%)                                    | n (%)      | n (%)                                     | n (%)          | n (%)                                    | n (%)      | n (%)                                    | n (%)          |
| <b>Vital tumor residuals</b>   | n | p <sup>(1)</sup> | 24                                       | 0.210      | 102                                       | 0.425          | 100                                      | 0.542      | 22                                       | 1.000          |
| < median (0 - 54%)             |   |                  | 2 (22.2)                                 | 7 (77.8)   | 22 (51.2)                                 | 21 (48.8)      | 25 (59.5)                                | 17 (40.5)  | 5 (55.6)                                 | 4 (44.4)       |
| ≥ median (55 - 100%)           |   |                  | 8 (53.3)                                 | 7 (46.7)   | 25 (42.4)                                 | 34 (57.6)      | 30 (51.7)                                | 28 (48.3)  | 7 (53.8)                                 | 6 (46.2)       |
| <b>Vital tumor residuals</b>   | n | p <sup>(2)</sup> | 24                                       | 0.340      | 102                                       | 0.962          | 100                                      | 0.217      | 22                                       | 0.912          |
| quartile 1 (0 - 4 %)           |   |                  | 2 (66.7)                                 | 1 (33.3)   | 5 (55.6)                                  | 4 (44.4)       | 7 (87.5)                                 | 1 (12.5)   | 2 (66.7)                                 | 1 (33.3)       |
| quartile 2 (5 - 54 %)          |   |                  | 0 (0.0)                                  | 6 (100.0)  | 17 (50.0)                                 | 17 (50.0)      | 18 (52.9)                                | 16 (47.1)  | 3 (50.0)                                 | 3 (50.0)       |
| quartile 3 (55 - 89 %)         |   |                  | 3 (50.0)                                 | 3 (50.0)   | 8 (27.6)                                  | 21 (72.4)      | 16 (55.2)                                | 13 (44.8)  | 2 (40.0)                                 | 3 (60.0)       |
| quartile 4 (90 - 100 %)        |   |                  | 5 (55.6)                                 | 4 (44.4)   | 17 (56.7)                                 | 13 (43.3)      | 14 (48.3)                                | 15 (51.7)  | 5 (62.5)                                 | 3 (37.5)       |
| <b>Becker regression score</b> | n | p <sup>(2)</sup> | 24                                       | 0.291      | 102                                       | 0.369          | 100                                      | 0.252      | 22                                       | 1.000          |
| 1a                             |   |                  | 1 (50.0)                                 | 1 (50.0)   |                                           |                |                                          |            | 1 (50.0)                                 | 1 (50.0)       |
| 1b                             |   |                  | 1 (50.0)                                 | 1 (50.0)   | 14 (60.9)                                 | 9 (39.1)       | 17 (73.9)                                | 6 (26.1)   | 1 (50.0)                                 | 1 (50.0)       |
| 2                              |   |                  | 0 (0.0)                                  | 5 (100.0)  | 6 (33.3)                                  | 12 (66.7)      | 7 (38.9)                                 | 11 (61.1)  | 3 (60.0)                                 | 2 (40.0)       |
| 3                              |   |                  | 8 (53.3)                                 | 7 (46.7)   | 27 (44.3)                                 | 34 (55.7)      | 31 (52.5)                                | 28 (47.5)  | 7 (53.8)                                 | 6 (46.2)       |

<sup>(1)</sup> Fisher's Exact Test

<sup>(2)</sup> Kendall's Tau Test

**Table S6** Correlation of LGR5-, MIST1- and FZD7-expression in pre-therapeutic biopsy, primary resected gastric cancer and lymph node metastases, respectively, with clinico-pathological patient characteristics. Immunoreactivity score dichotomized at the median into low and high or negative and positive.

|                     |          |                        | Pre-therapeutic biopsy<br>LGR5 Score 0-6 |            | Lymph node metastasis LGR5<br>Score 0-6 |            | Primary resected tumor<br>MIST1 Score 0-6 |                |
|---------------------|----------|------------------------|------------------------------------------|------------|-----------------------------------------|------------|-------------------------------------------|----------------|
|                     |          |                        | low (0-4)                                | high (5-6) | low (0-3)                               | high (4-6) | negative (0)                              | positive (2-6) |
|                     |          |                        | n (%)                                    | n (%)      | n (%)                                   | n (%)      | n (%)                                     | n (%)          |
| <b>Gender</b>       | <b>n</b> | <b>p<sup>(1)</sup></b> | 24                                       | 0.239      | 70                                      | 0.381      | 102                                       | 1.000          |
| male                |          |                        | 10 (47.6)                                | 11 (52.4)  | 24 (42.9)                               | 32 (57.1)  | 39 (46.4)                                 | 45 (53.6)      |
| female              |          |                        | 0 (0.0)                                  | 3 (100.0)  | 8 (57.1)                                | 6 (42.9)   | 8 (44.4)                                  | 10 (55.6)      |
| <b>Age</b>          | <b>n</b> | <b>p<sup>(1)</sup></b> | 24                                       | 0.214      | 70                                      | 0.346      | 102                                       | 0.696          |
| < 64 years          |          |                        | 7 (58.3)                                 | 5 (41.7)   | 19 (51.4)                               | 18 (48.6)  | 22 (44.0)                                 | 28 (56.0)      |
| ≥ 64 years          |          |                        | 3 (25.0)                                 | 9 (75.0)   | 13 (39.4)                               | 20 (60.6)  | 25 (48.1)                                 | 27 (51.9)      |
| <b>Lauren</b>       | <b>n</b> | <b>p<sup>(1)</sup></b> | 24                                       | 0.882      | 70                                      | 0.148      | 102                                       | 0.600          |
| intestinal          |          |                        | 4 (50.0)                                 | 4 (50.0)   | 12 (41.4)                               | 17 (58.6)  | 24 (49.0)                                 | 25 (51.0)      |
| diffus              |          |                        | 3 (50.0)                                 | 3 (50.0)   | 11 (64.7)                               | 6 (35.3)   | 13 (52.0)                                 | 12 (48.0)      |
| mixed               |          |                        | 1 (20.0)                                 | 4 (80.0)   | 7 (50.0)                                | 7 (50.0)   | 7 (38.9)                                  | 11 (61.1)      |
| unclassifiable      |          |                        | 1 (33.3)                                 | 2 (66.7)   | 2 (20.0)                                | 8 (80.0)   | 3 (30.0)                                  | 7 (70.0)       |
| complete regression |          |                        | 1 (50.0)                                 | 1 (50.0)   |                                         |            |                                           |                |
| <b>Localisation</b> | <b>n</b> | <b>p<sup>(1)</sup></b> | 24                                       | 0.240      | 70                                      | 0.466      | 102                                       | 1.000          |
| proximal            |          |                        | 7 (53.8)                                 | 6 (46.2)   | 18 (41.9)                               | 25 (58.1)  | 29 (45.3)                                 | 35 (54.7)      |
| distal              |          |                        | 3 (27.3)                                 | 8 (72.7)   | 14 (51.9)                               | 13 (48.1)  | 18 (47.4)                                 | 20 (52.6)      |
| <b>ypT-category</b> | <b>n</b> | <b>p<sup>(2)</sup></b> | 24                                       | 0.592      | 70                                      | 0.178      | 102                                       | 0.786          |
| T0                  |          |                        | 1 (50.0)                                 | 1 (50.0)   | 1 (33.3)                                | 2 (66.7)   |                                           |                |
| T1a / T1b           |          |                        | 1 (50.0)                                 | 1 (50.0)   | 1 (33.3)                                | 2 (66.7)   | 7 (38.9)                                  | 11 (61.1)      |
| T2                  |          |                        | 1 (33.3)                                 | 2 (66.7)   | 7 (63.6)                                | 4 (36.4)   | 10 (66.7)                                 | 5 (33.3)       |
| T3                  |          |                        | 7 (46.7)                                 | 8 (53.3)   | 22 (48.9)                               | 23 (51.1)  | 26 (42.6)                                 | 35 (57.4)      |
| T4a / T4b           |          |                        | 0 (0.0)                                  | 2 (100.0)  | 1 (12.5)                                | 7 (87.5)   | 4 (50.0)                                  | 4 (50.0)       |
| <b>ypN-category</b> | <b>n</b> | <b>p<sup>(2)</sup></b> | 24                                       | 0.665      | 70                                      | 0.105      | 102                                       | 0.983          |
| N0                  |          |                        | 3 (37.5)                                 | 5 (62.5)   |                                         |            | 13 (40.6)                                 | 19 (59.4)      |
| N1                  |          |                        | 2 (50.0)                                 | 2 (50.0)   | 14 (56.0)                               | 11 (44.0)  | 13 (54.2)                                 | 11 (45.8)      |
| N2                  |          |                        | 2 (28.6)                                 | 5 (71.4)   | 11 (47.8)                               | 12 (52.2)  | 13 (54.2)                                 | 11 (45.8)      |
| N3                  |          |                        | 3 (60.0)                                 | 2 (40.0)   | 7 (31.8)                                | 15 (68.2)  | 8 (36.4)                                  | 14 (63.6)      |
| <b>M-category</b>   | <b>n</b> | <b>p<sup>(1)</sup></b> | 24                                       | 1.000      | 70                                      | 0.381      | 102                                       | 0.613          |
| M0                  |          |                        | 7 (41.2)                                 | 10 (58.8)  | 24 (42.9)                               | 32 (57.1)  | 37 (44.6)                                 | 46 (55.4)      |
| M1                  |          |                        | 3 (42.9)                                 | 4 (57.1)   | 8 (57.1)                                | 6 (42.9)   | 10 (52.6)                                 | 9 (47.4)       |

|                               |          | Pre-therapeutic biopsy<br>LGR5 Score 0-6 |            | Lymph node metastasis<br>LGR5 Score 0-6 |            | Primary resected tumor<br>MIST1 Score 0-6 |                |           |
|-------------------------------|----------|------------------------------------------|------------|-----------------------------------------|------------|-------------------------------------------|----------------|-----------|
|                               |          | low (0-4)                                | high (5-6) | low (0-3)                               | high (4-6) | negative (0)                              | positive (2-6) |           |
|                               |          | n (%)                                    | n (%)      | n (%)                                   | n (%)      | n (%)                                     | n (%)          |           |
| <b>UICC-stage</b>             | <b>n</b> | <b>p<sup>(2)</sup></b>                   | 24         | 1.000                                   | 70         | 0.708                                     | 102            | 0.204     |
| 0 / 0/N+                      |          |                                          | 1 (50.0)   | 1 (50.0)                                | 0 (0.0)    | 2 (100.0)                                 |                |           |
| IA / IB                       |          |                                          | 0 (0.0)    | 1 (100.0)                               | 0 (0)      | 0 (0)                                     | 6 (33.3)       | 12 (66.7) |
| IIA / IIB                     |          |                                          | 2 (50.0)   | 2 (50.0)                                | 7 (63.6)   | 4 (36.4)                                  | 9 (42.9)       | 12 (57.1) |
| IIIA / IIIB / IIIC            |          |                                          | 4 (40.0)   | 6 (60.0)                                | 17 (39.5)  | 26 (60.5)                                 | 22 (50.0)      | 22 (50.0) |
| IV                            |          |                                          | 3 (42.9)   | 4 (57.1)                                | 8 (57.1)   | 6 (42.9)                                  | 10 (52.6)      | 9 (47.4)  |
| <b>L-category</b>             | <b>n</b> | <b>p<sup>(1)</sup></b>                   | 24         | 0.653                                   | 70         | 0.001 <sup>#</sup>                        | 102            | 0.400     |
| L0                            |          |                                          | 8 (47.1)   | 9 (52.9)                                | 26 (61.9)  | 16 (38.1)                                 | 34 (49.3)      | 35 (50.7) |
| L1                            |          |                                          | 2 (28.6)   | 5 (71.4)                                | 6 (21.4)   | 22 (78.6)                                 | 13 (39.4)      | 20 (60.6) |
| <b>V-category</b>             | <b>n</b> | <b>p<sup>(1)</sup></b>                   | 24         | 1.000                                   | 70         | 0.442                                     | 102            | 0.282     |
| V0                            |          |                                          | 10 (43.5)  | 13 (56.5)                               | 30 (47.6)  | 33 (52.4)                                 | 45 (47.9)      | 49 (52.1) |
| V1                            |          |                                          | 0 (0.0)    | 1 (100.0)                               | 2 (28.6)   | 5 (71.4)                                  | 2 (25.0)       | 6 (75.0)  |
| <b>Pn-category</b>            | <b>n</b> | <b>p<sup>(1)</sup></b>                   | 24         | 0.615                                   | 70         | 0.297                                     | 102            | 0.342     |
| Pn0                           |          |                                          | 9 (45.0)   | 11 (55.0)                               | 25 (50.0)  | 25 (50.0)                                 | 39 (48.8)      | 41 (51.2) |
| Pn1                           |          |                                          | 1 (25.0)   | 3 (75.0)                                | 7 (35.0)   | 13 (65.0)                                 | 8 (36.4)       | 14 (63.6) |
| <b>R-status</b>               | <b>n</b> | <b>p<sup>(1)</sup></b>                   | 24         | 0.114                                   | 70         | 0.399                                     | 102            | 0.365     |
| R0                            |          |                                          | 10 (50.0)  | 10 (50.0)                               | 29 (49.2)  | 30 (50.8)                                 | 42 (47.2)      | 47 (52.8) |
| R1                            |          |                                          | 0 (0.0)    | 4 (100.0)                               | 3 (30.0)   | 7 (70.0)                                  | 4 (33.3)       | 8 (66.7)  |
| RX                            |          |                                          | 0 (0)      | 0 (0)                                   | 0 (0.0)    | 1 (100.0)                                 | 1 (100.0)      | 0 (0.0)   |
| <b>Overall survival</b>       | <b>n</b> | <b>p<sup>(3)</sup></b>                   | 24         | 0.218                                   | 66         | 0.649                                     | 98             | 0.686     |
| total/events/censored         |          |                                          | 10/7/3     | 14/9/5                                  | 30/23/7    | 36/27/9                                   | 46/30/16       | 52/32/20  |
| median survival               |          |                                          | 29.5±17.0  | 13.5±7.0                                | 13.4±4.8   | 7.8±6.8                                   | 24.6±5.3       | 19.4±9.0  |
| 95% C.I.                      |          |                                          | 0.0-62.8   | 0.0-27.2                                | 3.9-22.9   | 0.0-21.1                                  | 14.2-35.1      | 1.7-37.1  |
| <b>Tumorspecific survival</b> | <b>n</b> | <b>p<sup>(3)</sup></b>                   | 24         | 0.706                                   | 66         | 0.839                                     | 98             | 0.797     |
| total/events/censored         |          |                                          | 10/6/4     | 14/6/8                                  | 30/20/10   | 36/22/14                                  | 46/27/19       | 52/24/28  |
| median survival               |          |                                          | 29.5±15.3  | 26.7±10.1                               | 15.1±5.6   | 19.8±10.5                                 | 27.3±4.9       | 26.7±7.0  |
| 95% C.I.                      |          |                                          | 0.0-59.4   | 7.0-46.5                                | 4.1-26.2   | 0.0-40.3                                  | 17.7-37.0      | 13.1-40.4 |



Table S6 – continued 1

|                     |          |                        | Pre-therapeutic biopsy<br>MIST1 Score 0-6 |                | Primary resected tumor<br>FZD7 Score 0-6 |            | Pre-therapeutic biopsy<br>FZD7 Score 0-6 |                |
|---------------------|----------|------------------------|-------------------------------------------|----------------|------------------------------------------|------------|------------------------------------------|----------------|
|                     |          |                        | negative (0)                              | positive (2-6) | low (0-3)                                | high (4-6) | negative (0)                             | positive (2-6) |
|                     |          |                        | n (%)                                     | n (%)          | n (%)                                    | n (%)      | n (%)                                    | n (%)          |
| <b>Gender</b>       | <b>n</b> | <b>p<sup>(1)</sup></b> | 23                                        | 1.000          | 100                                      | 0.434      | 22                                       | 1.000          |
| male                |          |                        | 15 (75.0)                                 | 5 (25.0)       | 47 (57.3)                                | 35 (42.7)  | 10 (52.6)                                | 9 (47.4)       |
| female              |          |                        | 2 (66.7)                                  | 1 (33.3)       | 8 (44.4)                                 | 10 (55.6)  | 2 (66.7)                                 | 1 (33.3)       |
| <b>Age</b>          | <b>n</b> | <b>p<sup>(1)</sup></b> | 23                                        | 0.640          | 100                                      | 0.231      | 22                                       | 0.670          |
| < 64 years          |          |                        | 8 (66.7)                                  | 4 (33.3)       | 29 (61.7)                                | 18 (38.3)  | 7 (63.6)                                 | 4 (36.4)       |
| ≥ 64 years          |          |                        | 9 (81.8)                                  | 2 (18.2)       | 26 (49.1)                                | 27 (50.9)  | 5 (45.5)                                 | 6 (54.5)       |
| <b>Lauren</b>       | <b>n</b> | <b>p<sup>(1)</sup></b> | 23                                        | 0.219          | 100                                      | 0.170      | 22                                       | 0.340          |
| intestinal          |          |                        | 5 (62.5)                                  | 3 (37.5)       | 33 (66.0)                                | 17 (34.0)  | 2 (25.0)                                 | 6 (75.0)       |
| diffus              |          |                        | 6 (100.0)                                 | 0 (0.0)        | 10 (41.7)                                | 14 (58.3)  | 3 (75.0)                                 | 1 (25.0)       |
| mixed               |          |                        | 3 (75.0)                                  | 1 (25.0)       | 8 (47.1)                                 | 9 (52.9)   | 4 (80.0)                                 | 1 (20.0)       |
| unclassifiable      |          |                        | 1 (33.3)                                  | 2 (66.7)       | 4 (44.4)                                 | 5 (55.6)   | 2 (66.7)                                 | 1 (33.3)       |
| complete regression |          |                        | 2 (100.0)                                 | 0 (0.0)        |                                          |            | 1 (50.0)                                 | 1 (50.0)       |
| <b>Localisation</b> | <b>n</b> | <b>p<sup>(1)</sup></b> | 23                                        | 1.000          | 100                                      | 0.062      | 22                                       | 1.000          |
| proximal            |          |                        | 9 (75.0)                                  | 3 (25.0)       | 39 (62.9)                                | 23 (37.1)  | 7 (53.8)                                 | 6 (46.2)       |
| distal              |          |                        | 8 (72.7)                                  | 3 (27.3)       | 16 (42.1)                                | 22 (57.9)  | 5 (55.6)                                 | 4 (44.4)       |
| <b>ypT-category</b> | <b>n</b> | <b>p<sup>(2)</sup></b> | 23                                        | 0.683          | 100                                      | 0.094      | 22                                       | 0.952          |
| T0                  |          |                        | 2 (100.0)                                 | 0 (0.0)        |                                          |            | 1 (50.0)                                 | 1 (50.0)       |
| T1a / T1b           |          |                        | 2 (100.0)                                 | 0 (0.0)        | 12 (70.6)                                | 5 (29.4)   | 1 (50.0)                                 | 1 (50.0)       |
| T2                  |          |                        | 1 (33.3)                                  | 2 (66.7)       | 8 (53.3)                                 | 7 (46.7)   | 2 (66.7)                                 | 1 (33.3)       |
| T3                  |          |                        | 11 (78.6)                                 | 3 (21.4)       | 33 (55.0)                                | 27 (45.0)  | 7 (53.8)                                 | 6 (46.2)       |
| T4a / T4b           |          |                        | 1 (50.0)                                  | 1 (50.0)       | 2 (25.0)                                 | 6 (75.0)   | 1 (50.0)                                 | 1 (50.0)       |
| <b>ypN-category</b> | <b>n</b> | <b>p<sup>(2)</sup></b> | 23                                        | 0.989          | 100                                      | 0.630      | 22                                       | 0.052          |
| N0                  |          |                        | 6 (85.7)                                  | 1 (14.3)       | 17 (56.7)                                | 13 (43.3)  | 3 (37.5)                                 | 5 (62.5)       |
| N1                  |          |                        | 2 (50.0)                                  | 2 (50.0)       | 15 (60.0)                                | 10 (40.0)  | 1 (25.0)                                 | 3 (75.0)       |
| N2                  |          |                        | 5 (71.4)                                  | 2 (28.6)       | 12 (50.0)                                | 12 (50.0)  | 5 (71.4)                                 | 2 (28.6)       |
| N3                  |          |                        | 4 (80.0)                                  | 1 (20.0)       | 11 (52.4)                                | 10 (47.6)  | 3 (100.0)                                | 0 (0.0)        |
| <b>M-category</b>   | <b>n</b> | <b>p<sup>(1)</sup></b> | 23                                        | 1.000          | 100                                      | 0.786      | 22                                       | 1.000          |
| M0                  |          |                        | 12 (70.6)                                 | 5 (29.4)       | 47 (56.0)                                | 37 (44.0)  | 9 (52.9)                                 | 8 (47.1)       |
| M1                  |          |                        | 5 (83.3)                                  | 1 (16.7)       | 8 (50.0)                                 | 8 (50.0)   | 3 (60.0)                                 | 2 (40.0)       |

|                               |          |                        | Pre-therapeutic biopsy<br>MIST1 Score 0-6 |                | Primary resected tumor<br>FZD7 Score 0-6 |            | Pre-therapeutic biopsy<br>FZD7 Score 0-6 |                |
|-------------------------------|----------|------------------------|-------------------------------------------|----------------|------------------------------------------|------------|------------------------------------------|----------------|
|                               |          |                        | negative (0)                              | positive (2-6) | low (0-3)                                | high (4-6) | negative (0)                             | positive (2-6) |
|                               |          |                        | n (%)                                     | n (%)          | n (%)                                    | n (%)      | n (%)                                    | n (%)          |
| <b>UICC-stage</b>             | <b>n</b> | <b>p<sup>(2)</sup></b> | 23                                        | 0.483          | 100                                      | 0.369      | 22                                       | 0.271          |
| 0 / 0/N+                      |          |                        | 2 (100.0)                                 | 0 (0.0)        |                                          |            | 1 (50.0)                                 | 1 (50.0)       |
| IA / IB                       |          |                        | 1 (100.0)                                 | 0 (0.0)        | 14 (77.8)                                | 4 (22.2)   | 0 (0.0)                                  | 1 (100.0)      |
| IIA / IIB                     |          |                        | 1 (25.0)                                  | 3 (75.0)       | 8 (38.1)                                 | 13 (61.9)  | 1 (25.0)                                 | 3 (75.0)       |
| IIIA / IIIB / IIIC            |          |                        | 8 (80.0)                                  | 2 (20.0)       | 25 (55.6)                                | 20 (44.4)  | 7 (70.0)                                 | 3 (30.0)       |
| IV                            |          |                        | 5 (83.3)                                  | 1 (16.7)       | 8 (50.0)                                 | 8 (50.0)   | 3 (60.0)                                 | 2 (40.0)       |
| <b>L-category</b>             | <b>n</b> | <b>p<sup>(1)</sup></b> | 23                                        | 0.632          | 100                                      | 0.832      | 22                                       | 0.162          |
| L0                            |          |                        | 13 (76.5)                                 | 4 (23.5)       | 38 (55.9)                                | 30 (44.1)  | 7 (43.8)                                 | 9 (56.3)       |
| L1                            |          |                        | 4 (66.7)                                  | 2 (33.3)       | 17 (53.1)                                | 15 (46.9)  | 5 (83.3)                                 | 1 (16.7)       |
| <b>V-category</b>             | <b>n</b> | <b>p<sup>(1)</sup></b> | 23                                        | 0.261          | 100                                      | 0.698      | 22                                       | 1.000          |
| V0                            |          |                        | 17 (77.3)                                 | 5 (22.7)       | 52 (55.9)                                | 41 (44.1)  | 11 (52.4)                                | 10 (47.6)      |
| V1                            |          |                        | 0 (0.0)                                   | 1 (100.0)      | 3 (42.9)                                 | 4 (57.1)   | 1 (100.0)                                | 0 (0.0)        |
| <b>Pn-category</b>            | <b>n</b> | <b>p<sup>(1)</sup></b> | 23                                        | 1.000          | 100                                      | 0.810      | 22                                       | 0.594          |
| Pn0                           |          |                        | 14 (73.7)                                 | 5 (26.3)       | 44 (55.7)                                | 35 (44.3)  | 9 (50.0)                                 | 9 (50.0)       |
| Pn1                           |          |                        | 3 (75.0)                                  | 1 (25.0)       | 11 (52.4)                                | 10 (47.6)  | 3 (75.0)                                 | 1 (25.0)       |
| <b>R-status</b>               | <b>n</b> | <b>p<sup>(1)</sup></b> | 23                                        | 1.000          | 100                                      | 0.864      | 22                                       | 1.000          |
| R0                            |          |                        | 15 (75.0)                                 | 5 (25.0)       | 48 (53.9)                                | 41 (46.1)  | 10 (55.6)                                | 8 (44.4)       |
| R1                            |          |                        | 2 (66.7)                                  | 1 (33.3)       | 6 (60.0)                                 | 4 (40.0)   | 2 (50.0)                                 | 2 (50.0)       |
| RX                            |          |                        | 0 (0)                                     | 0 (0)          | 1 (100.0)                                | 0 (0.0)    | 0 (0)                                    | 0 (0)          |
| <b>Overall survival</b>       | <b>n</b> | <b>p<sup>(3)</sup></b> | 23                                        | 0.924          | 96                                       | 0.674      | 22                                       | 0.036          |
| total/events/ censored        |          |                        | 17/11/6                                   | 6/4/2          | 52/33/19                                 | 44/26/18   | 12/8/4                                   | 10/6/4         |
| median survival               |          |                        | 29.5±17.3                                 | 12.9±2.9       | 22.4±4.0                                 | 24.6±9.1   | 12.9±2.3                                 | 37.8±7.3       |
| 95% C.I.                      |          |                        | 0.0-63.4                                  | 7.3-18.6       | 14.6-30.2                                | 6.8-42.4   | 8.5-17.4                                 | 23.6-52.1      |
| <b>Tumorspecific survival</b> | <b>n</b> | <b>p<sup>(3)</sup></b> | 23                                        | 0.933          | 96                                       | 0.200      | 22                                       | 0.017          |
| total/events/ censored        |          |                        | 17/8/9                                    | 6/3/3          | 52/30/22                                 | 44/18/26   | 12/7/5                                   | 10/3/7         |
| median survival               |          |                        | 29.5±20.3                                 | 39.0±0.0       | 22.4±4.1                                 | 39.0±9.7   | 13.5±2.2                                 | 39.0           |
| 95% C.I.                      |          |                        | 0.0-69.2                                  |                | 14.4-30.4                                | 20.1-58.0  | 9.1-17.8                                 |                |

Table S6 – continued 2

|                     |          |                        | Lymph node metastasis<br>FZD7 Score 0-6 |                |
|---------------------|----------|------------------------|-----------------------------------------|----------------|
|                     |          |                        | negative (0)                            | positive (2-6) |
|                     |          |                        | n (%)                                   | n (%)          |
| <b>Gender</b>       | <b>n</b> | <b>p<sup>(1)</sup></b> | 63                                      | 1.000          |
| male                |          |                        | 24 (47.1)                               | 27 (52.9)      |
| female              |          |                        | 5 (41.7)                                | 7 (58.3)       |
| <b>Age</b>          | <b>n</b> | <b>p<sup>(1)</sup></b> | 63                                      | 0.614          |
| < 64 years          |          |                        | 17 (50.0)                               | 17 (50.0)      |
| ≥ 64 years          |          |                        | 12 (41.4)                               | 17 (58.6)      |
| <b>Lauren</b>       | <b>n</b> | <b>p<sup>(1)</sup></b> | 63                                      | 1.000          |
| intestinal          |          |                        | 13 (48.1)                               | 14 (51.9)      |
| diffus              |          |                        | 6 (42.9)                                | 8 (57.1)       |
| mixed               |          |                        | 6 (46.2)                                | 7 (53.8)       |
| unclassifiable      |          |                        | 4 (44.4)                                | 5 (55.6)       |
| complete regression |          |                        |                                         |                |
| <b>Localisation</b> | <b>n</b> | <b>p<sup>(1)</sup></b> | 63                                      | 0.128          |
| proximal            |          |                        | 21 (53.8)                               | 18 (46.2)      |
| distal              |          |                        | 8 (33.3)                                | 16 (66.7)      |
| <b>ypT-category</b> | <b>n</b> | <b>p<sup>(2)</sup></b> | 63                                      | 0.785          |
| T0                  |          |                        | 1 (50.0)                                | 1 (50.0)       |
| T1a / T1b           |          |                        | 1 (50.0)                                | 1 (50.0)       |
| T2                  |          |                        | 4 (36.4)                                | 7 (63.6)       |
| T3                  |          |                        | 21 (52.5)                               | 19 (47.5)      |
| T4a / T4b           |          |                        | 2 (25.0)                                | 6 (75.0)       |
| <b>ypN-category</b> | <b>n</b> | <b>p<sup>(2)</sup></b> | 63                                      | 0.328          |
| N0                  |          |                        |                                         |                |
| N1                  |          |                        | 12 (54.5)                               | 10 (45.5)      |
| N2                  |          |                        | 9 (42.9)                                | 12 (57.1)      |
| N3                  |          |                        | 8 (40.0)                                | 12 (60.0)      |
| <b>M-category</b>   | <b>n</b> | <b>p<sup>(1)</sup></b> | 63                                      | 1.000          |
| M0                  |          |                        | 24 (45.3)                               | 29 (54.7)      |
| M1                  |          |                        | 5 (50.0)                                | 5 (50.0)       |

|                               |          |                        | Lymph node metastasis<br>FZD7 Score 0-6 |                |
|-------------------------------|----------|------------------------|-----------------------------------------|----------------|
|                               |          |                        | negative (0)                            | positive (2-6) |
|                               |          |                        | n (%)                                   | n (%)          |
| <b>UICC-stage</b>             | <b>n</b> | <b>p<sup>(2)</sup></b> | 63                                      | 0.773          |
| 0 / 0/N+                      |          |                        | 1 (50.0)                                | 1 (50.0)       |
| IA / IB                       |          |                        | 0 (0)                                   | 0 (0)          |
| IIA / IIB                     |          |                        | 4 (40.0)                                | 6 (60.0)       |
| IIIA / IIIB / IIIC            |          |                        | 19 (46.3)                               | 22 (53.7)      |
| IV                            |          |                        | 5 (50.0)                                | 5 (50.0)       |
| <b>L-category</b>             | <b>n</b> | <b>p<sup>(1)</sup></b> | 63                                      | 1.000          |
| L0                            |          |                        | 17 (47.2)                               | 19 (52.8)      |
| L1                            |          |                        | 12 (44.4)                               | 15 (55.6)      |
| <b>V-category</b>             | <b>n</b> | <b>p<sup>(1)</sup></b> | 63                                      | 0.437          |
| V0                            |          |                        | 27 (48.2)                               | 29 (51.8)      |
| V1                            |          |                        | 2 (28.6)                                | 5 (71.4)       |
| <b>Pn-category</b>            | <b>n</b> | <b>p<sup>(1)</sup></b> | 63                                      | 0.586          |
| Pn0                           |          |                        | 19 (43.2)                               | 25 (56.8)      |
| Pn1                           |          |                        | 10 (52.6)                               | 9 (47.4)       |
| <b>R-status</b>               | <b>n</b> | <b>p<sup>(1)</sup></b> | 63                                      | 0.484          |
| R0                            |          |                        | 23 (43.4)                               | 30 (56.6)      |
| R1                            |          |                        | 5 (55.6)                                | 4 (44.4)       |
| RX                            |          |                        | 1 (100.0)                               | 0 (0.0)        |
| <b>Overall survival</b>       | <b>n</b> | <b>p<sup>(3)</sup></b> | 59                                      | 0.643          |
| total/events/censored         |          |                        | 27/19/8                                 | 32/25/7        |
| median survival               |          |                        | 12.9±4.1                                | 13.4±7.5       |
| 95% C.I.                      |          |                        | 4.9-21.0                                | 0.0-28.2       |
| <b>Tumorspecific survival</b> | <b>n</b> | <b>p<sup>(3)</sup></b> | 59                                      | 0.256          |
| total/events/censored         |          |                        | 27/18/9                                 | 32/19/13       |
| median survival               |          |                        | 12.9±5.1                                | 22.1±8.7       |
| 95% C.I.                      |          |                        | 3.0-22.9                                | 5.1-39.2       |

<sup>(1)</sup> Fisher's Exact Test

<sup>(2)</sup> Kendall's Tau Test

<sup>(3)</sup> Log-Rank Test

# significant after multiple testing

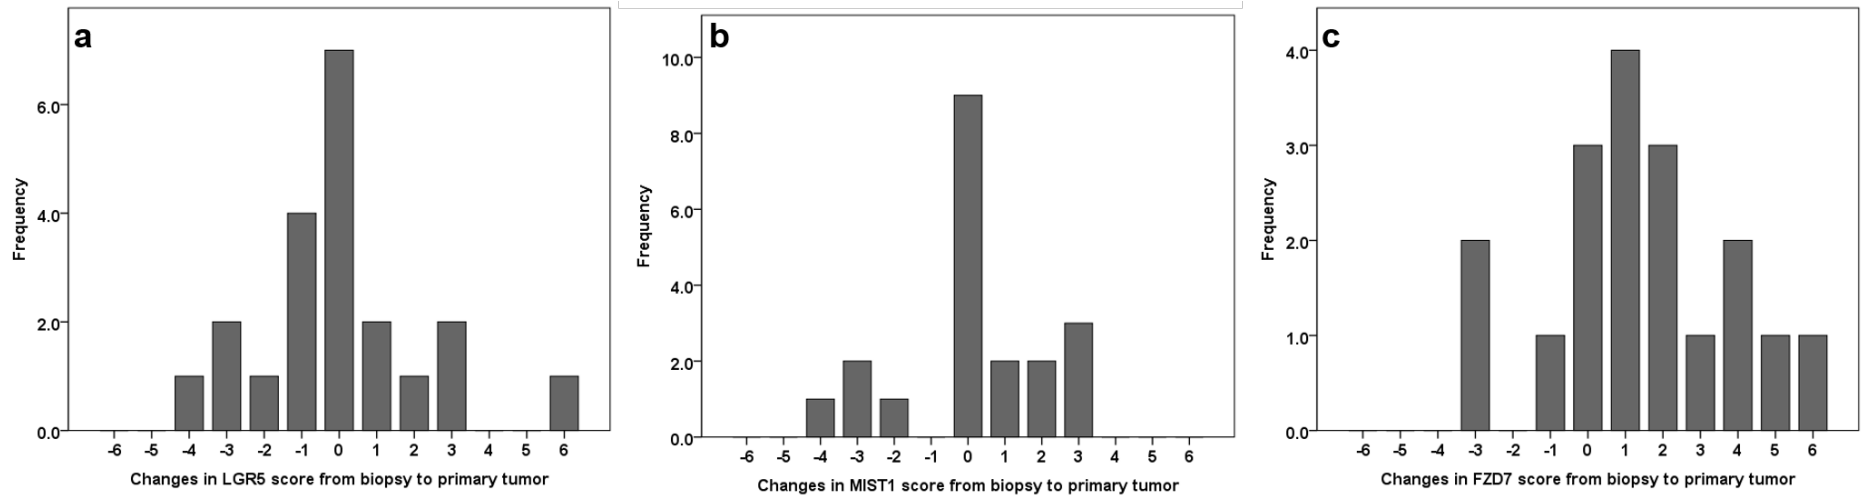

**Figure S7 Changes in the immunoreactivity score from pre- to post-therapeutic tissue**

This figure illustrates the change of the immunoreactivity score assessed in pre-therapeutic biopsy with the expression in the corresponding primary tumor. As shown, there is no systemic up- or down-regulation for any of the three putative stem cell markers, i.e. LGR5 (a;  $p=0.087$ ), MIST1 (b;  $p=0.642$ ) or FZD7 (c;  $p=0.637$ ).

**Table S8** Correlation of clinico-pathological patient characteristics with tumor-specific survival of the patient cohort

|                     | <b>Patients</b><br>(n) | <b>Events</b><br>(n) | <b>Median survival</b><br>(month; (95% C.I.)) | <b>P-value</b><br>(Logrank-Test) |
|---------------------|------------------------|----------------------|-----------------------------------------------|----------------------------------|
| <b>Gender</b>       |                        |                      |                                               | 0.310                            |
| male                | 91                     | 46                   | 27.3 (20.7 - 33.9)                            |                                  |
| female              | 24                     | 9                    |                                               |                                  |
| <b>Age</b>          |                        |                      |                                               | 0.933                            |
| < 64 years          | 58                     | 28                   | 27.3 (10.5 - 44.1)                            |                                  |
| ≥ 64 years          | 57                     | 27                   | 30.9 (24.0 - 37.8)                            |                                  |
| <b>Lauren</b>       |                        |                      |                                               | 0.036                            |
| intestinal          | 51                     | 23                   |                                               |                                  |
| diffus              | 24                     | 14                   |                                               |                                  |
| mixed               | 16                     | 9                    |                                               |                                  |
| unclassifiable      | 14                     | 9                    |                                               |                                  |
| complete regression | 10                     | 0                    |                                               |                                  |
| <b>Localisation</b> |                        |                      |                                               | 0.284                            |
| proximal            | 71                     | 36                   | 26.7 (20.7 - 32.8)                            |                                  |
| distal              | 44                     | 19                   | 41.0 (0.0 - 86.5)                             |                                  |
| <b>ypT-category</b> |                        |                      |                                               | 0.009                            |
| T0                  | 13                     | 3                    |                                               |                                  |
| T1a / T1b           | 19                     | 4                    |                                               |                                  |
| T2                  | 14                     | 8                    | 39.0 (0.0 - 100.9)                            |                                  |
| T3                  | 60                     | 37                   | 19.8 (8.6 - 31.0)                             |                                  |
| T4a / T4b           | 9                      | 3                    | 13.2                                          |                                  |
| <b>ypN-category</b> |                        |                      |                                               | <0.001                           |
| N0                  | 44                     | 9                    |                                               |                                  |
| N1                  | 25                     | 17                   | 24.3 (11.1 - 37.4)                            |                                  |
| N2                  | 25                     | 11                   | 22.4 (9.3 - 35.5)                             |                                  |
| N3                  | 21                     | 18                   | 7.5 (6.1 - 8.8)                               |                                  |
| <b>M-category</b>   |                        |                      |                                               | 0.002                            |
| M0                  | 95                     | 39                   | 39.0                                          |                                  |
| M1                  | 20                     | 16                   | 13.5 (1.6 - 25.3)                             |                                  |

|                                | <b>Patients</b><br>(n) | <b>Events</b><br>(n) | <b>Median survival</b><br>(month; (95% C.I.)) | <b>P-value</b><br>(Logrank-Test) |
|--------------------------------|------------------------|----------------------|-----------------------------------------------|----------------------------------|
| <b>UICC-stage</b>              |                        |                      |                                               | <0.001                           |
| 0 / 0/N+                       | 12                     | 2                    |                                               |                                  |
| IA / IB                        | 19                     | 3                    |                                               |                                  |
| IIA / IIB                      | 19                     | 6                    |                                               |                                  |
| IIIA / IIIB / IIIC             | 45                     | 28                   | 13.4 (0.0 - 27.9)                             |                                  |
| IV                             | 20                     | 16                   | 13.5 (1.6 - 25.3)                             |                                  |
| <b>L-category</b>              |                        |                      |                                               | <0.001                           |
| L0                             | 82                     | 30                   | 61.5                                          |                                  |
| L1                             | 33                     | 25                   | 7.6 (6.6 - 8.7)                               |                                  |
| <b>V-category</b>              |                        |                      |                                               | <0.001                           |
| V0                             | 107                    | 49                   | 31.7 (20.0 - 43.4)                            |                                  |
| V1                             | 8                      | 6                    | 4.9 (3.1 - 6.7)                               |                                  |
| <b>Pn-category</b>             |                        |                      |                                               | <0.001                           |
| Pn0                            | 93                     | 38                   | 32.3 (2.5 - 62.1)                             |                                  |
| Pn1                            | 22                     | 17                   | 7.6 (5.5 - 9.6)                               |                                  |
| <b>R-status</b>                |                        |                      |                                               | <0.001                           |
| R0                             | 102                    | 45                   | 32.0 (19.5 - 44.5)                            |                                  |
| R1                             | 12                     | 9                    | 7.0 (2.3 - 11.8)                              |                                  |
| RX                             | 1                      | 1                    | 5.7                                           |                                  |
| <b>Vital tumor residuals</b>   |                        |                      |                                               | 0.021                            |
| < median (0 - 54%)             | 58                     | 25                   | 41.0                                          |                                  |
| ≥ median (55 - 100%)           | 57                     | 30                   | 22.1 (2.1 - 42.2)                             |                                  |
| <b>Vital tumor residuals</b>   |                        |                      |                                               | 0.061                            |
| quartile 1 (0 - 4 %)           | 23                     | 10                   | 29.5 (0.0 - 82.4)                             |                                  |
| quartile 2 (5 - 54 %)          | 35                     | 15                   | 41.0                                          |                                  |
| quartile 3 (55 - 89 %)         | 27                     | 13                   | 26.7 (13.8 - 39.7)                            |                                  |
| quartile 4 (90 - 100 %)        | 30                     | 17                   | 12.9 (0.5 - 25.4)                             |                                  |
| <b>Becker regression score</b> |                        |                      |                                               | 0.054                            |
| 1a                             | 13                     | 3                    |                                               |                                  |
| 1b                             | 24                     | 12                   | 30.9 (0.0 - 71.9)                             |                                  |
| 2                              | 19                     | 8                    | 41.0                                          |                                  |
| 3                              | 59                     | 32                   | 22.1 (4.5 - 39.8)                             |                                  |

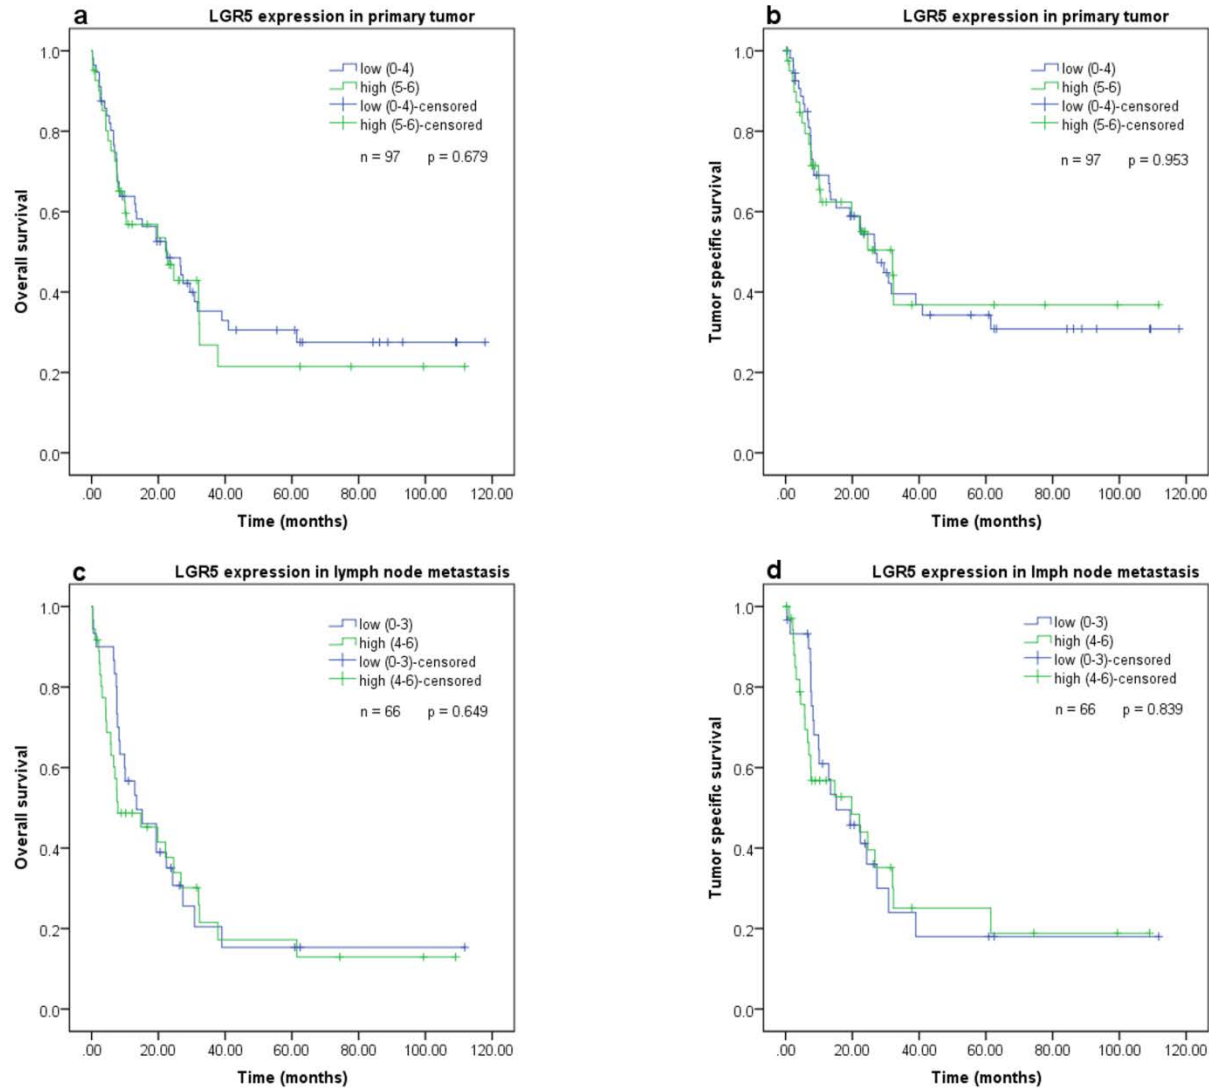

**Figure S9 Survival analysis LGR5**

Kaplan-Meier curves depicting overall survival of the validation cohort according to the LGR5 expression in primary tumor (a) and lymph node metastasis (c) as well as tumor specific survival of the validation cohort according to the LGR5 expression in primary tumor (b) and lymph node metastasis (d).



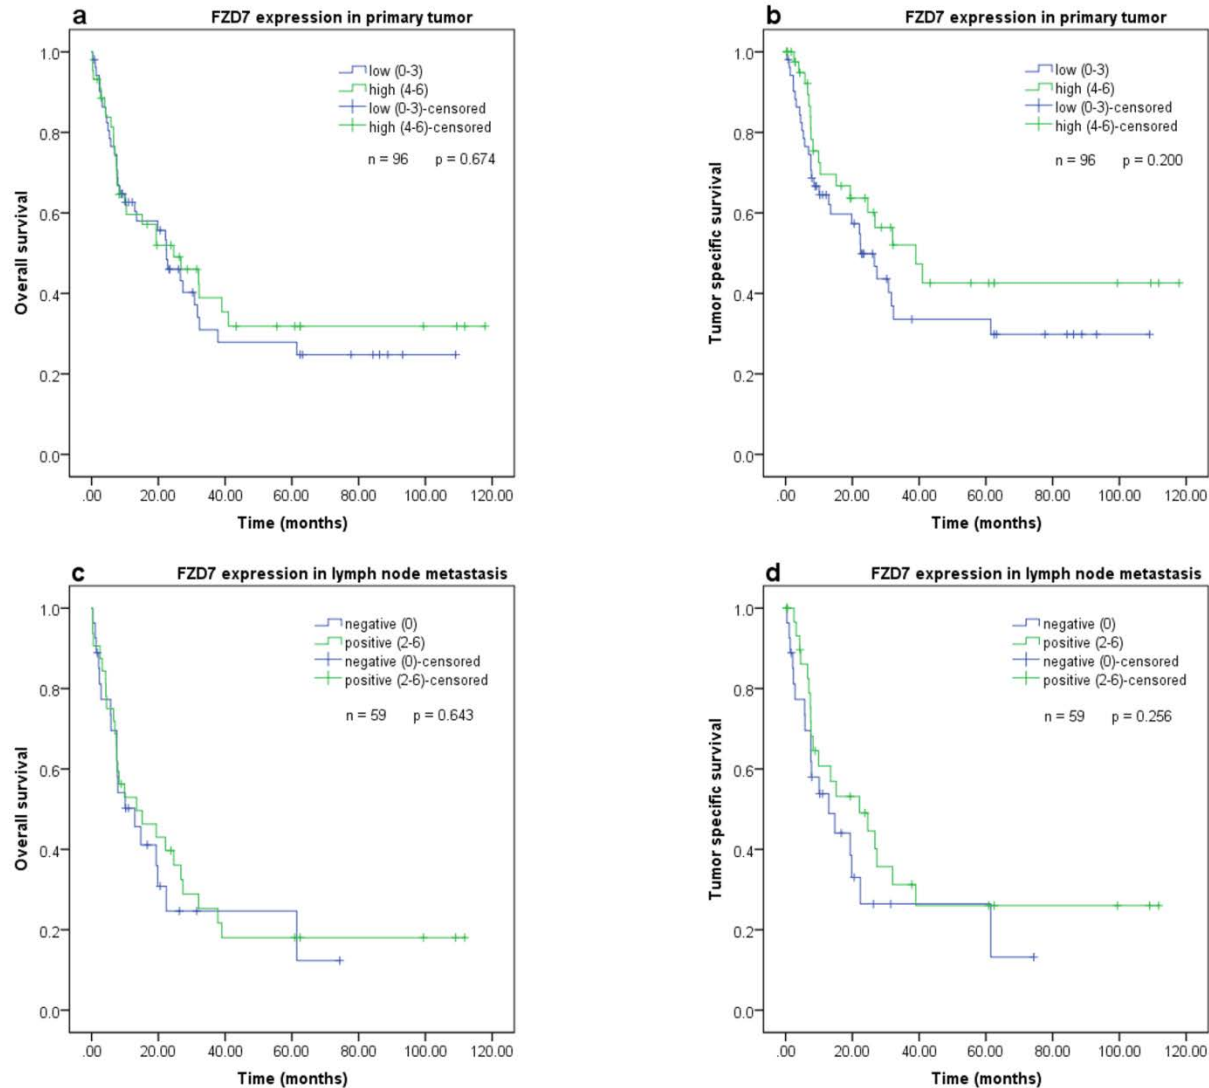

**Figure S10 Survival analysis FZD7**

Kaplan-Meier curves depicting overall survival of the validation cohort according to the FZD7 expression in primary tumor (a) and lymph node metastasis (c) as well as tumor specific survival of the validation cohort according to the FZD7 expression in primary tumor (b) and lymph node metastasis (d).
